# Supplementary material for: Smoke-Free Policies and Smoking Cessation in the United States, 2003–2015
Source: PubMed Central journal article supplement (PMC6747670; doi:10.3390/ijerph16173200), 2019-09-02
Supplement: ijerph-16-03200-s001.pdf [file ijerph-16-03200-s001.pdf]

S1. Odds ratios for cessation associated with smoke-free workplace law coverage by gender.

| <b>Model 4</b>           |                     |                     |                     |
|--------------------------|---------------------|---------------------|---------------------|
|                          | Ages<br>25–39       | Ages<br>40–54       | Ages<br>55–65       |
| Smoke-free workplace law | 1.04<br>(0.83–1.32) | 1.23<br>(0.95–1.60) | 0.97<br>(0.69–1.37) |
| Male                     | 0.92<br>(0.82–1.04) | 0.96<br>(0.85–1.09) | 0.95<br>(0.80–1.13) |
| Law*Male                 | 1.04<br>(0.86–1.25) | 1.07<br>(0.86–1.32) | 1.01<br>(0.77–1.32) |

Model controls for other smoke-free laws, education, race/ethnicity, family income, gender, age, state-level tobacco price, state-level anti-smoking sentiment, and state tobacco control expenditures, with state and year fixed effects. \* $P < 0.05$ ; \*\* $P < 0.01$ ; \*\*\* $P < 0.001$ .

S2. Odds ratios for cessation associated with smoke-free workplace law coverage across levels of education, and education and gender.

|                                | <b>Model 5</b>         |                  |                        |                  |                     |                  | <b>Model 6</b>         |                  |                        |                  |                     |                  |
|--------------------------------|------------------------|------------------|------------------------|------------------|---------------------|------------------|------------------------|------------------|------------------------|------------------|---------------------|------------------|
|                                | Ages<br>25–39          | P <sub>int</sub> | Ages<br>40–54          | P <sub>int</sub> | Ages<br>55–65       | P <sub>int</sub> | Ages<br>25–39          | P <sub>int</sub> | Ages<br>40–54          | P <sub>int</sub> | Ages<br>55–65       | P <sub>int</sub> |
| Smoke-free workplace law       | 1.04<br>(0.79–1.35)    |                  | 1.20<br>(0.86–1.66)    |                  | 1.07<br>(0.68–1.67) |                  | 0.91<br>(0.66–1.26)    |                  | 1.28<br>(0.86–1.92)    |                  | 1.22<br>(0.68–2.20) |                  |
| Male                           | 0.94<br>(0.86–1.02)    |                  | 0.99<br>(0.90–1.09)    |                  | 0.95<br>(0.84–1.08) |                  | 0.84<br>(0.67–1.06)    |                  | 1.01<br>(0.75–1.35)    |                  | 1.23<br>(0.79–1.91) |                  |
| Education (College+ reference) |                        |                  |                        |                  |                     |                  |                        |                  |                        |                  |                     |                  |
| Less than high school (HS)     | 0.34***<br>(0.27–0.43) |                  | 0.53***<br>(0.41–0.68) |                  | 0.76<br>(0.55–1.03) |                  | 0.30***<br>(0.21–0.42) |                  | 0.59**<br>(0.41–0.83)  |                  | 0.87<br>(0.54–1.38) |                  |
| HS or equivalent               | 0.45***<br>(0.38–0.53) |                  | 0.65***<br>(0.54–0.78) |                  | 0.82<br>(0.62–1.07) |                  | 0.43***<br>(0.34–0.53) |                  | 0.63***<br>(0.49–0.82) |                  | 0.97<br>(0.65–1.44) |                  |
| Some college                   | 0.67***<br>(0.57–0.78) |                  | 0.83*<br>(0.69–1.00)   |                  | 0.94<br>(0.72–1.23) |                  | 0.62***<br>(0.51–0.76) |                  | 0.87<br>(0.68–1.13)    |                  | 1.18<br>(0.79–1.75) |                  |
| Law*Education                  |                        |                  |                        |                  |                     |                  |                        |                  |                        |                  |                     |                  |
| Law*Less than HS               | 1.10<br>(0.74–1.64)    |                  | 1.09<br>(0.72–1.65)    |                  | 0.79<br>(0.48–1.32) |                  | 1.60<br>(0.92–2.76)    |                  | 0.72<br>(0.39–1.30)    |                  | 0.87<br>(0.41–1.84) |                  |
| Law*HS or equiv.               | 1.03<br>(0.80–1.33)    | 0.969            | 1.15<br>(0.85–1.56)    | 0.712            | 0.94<br>(0.63–1.42) | 0.815            | 1.15<br>(0.80–1.66)    |                  | 1.14<br>(0.75–1.73)    |                  | 0.83<br>(0.46–1.49) |                  |
| Law*Some college               | 1.02<br>(0.80–1.30)    |                  | 1.01<br>(0.74–1.37)    |                  | 0.89<br>(0.59–1.33) |                  | 1.17<br>(0.83–1.63)    |                  | 0.86<br>(0.57–1.31)    |                  | 0.67<br>(0.37–1.21) |                  |
| Law*Male                       |                        |                  |                        |                  |                     |                  | 1.27<br>(0.87–1.84)    |                  | 0.88<br>(0.53–1.44)    |                  | 0.81<br>(0.41–1.58) |                  |
| Education*Male                 |                        |                  |                        |                  |                     |                  |                        |                  |                        |                  |                     |                  |
| Less than HS*Male              |                        |                  |                        |                  |                     |                  | 1.25<br>(0.79–1.96)    |                  | 0.82<br>(0.51–1.34)    |                  | 0.80<br>(0.44–1.47) |                  |
| HS or equivalent*Male          |                        |                  |                        |                  |                     |                  | 1.10<br>(0.81–1.49)    |                  | 1.04<br>(0.72–1.49)    |                  | 0.75<br>(0.44–1.27) |                  |
| Some college*Male              |                        |                  |                        |                  |                     |                  | 1.13<br>(0.84–1.53)    |                  | 0.90<br>(0.62–1.30)    |                  | 0.68<br>(0.40–1.17) |                  |
| Law*Education*Male             |                        |                  |                        |                  |                     |                  |                        |                  |                        |                  |                     |                  |
| Law*Less than HS*Male          |                        |                  |                        |                  |                     |                  | 0.52<br>(0.24–1.13)    |                  | 2.05<br>(0.90–4.68)    |                  | 0.80<br>(0.29–2.22) |                  |
| Law*HS or equiv*Male           |                        |                  |                        |                  |                     |                  | 0.81<br>(0.49–1.35)    | 0.412            | 1.03<br>(0.56–1.88)    | 0.230            | 1.24<br>(0.55–2.77) | 0.378            |
| Law*Some college*Male          |                        |                  |                        |                  |                     |                  | 0.78<br>(0.48–1.27)    |                  | 1.37<br>(0.74–2.53)    |                  | 1.64<br>(0.73–3.70) |                  |

Models control for other smoke-free laws, race/ethnicity, family income, gender, age, state-level tobacco price, state-level anti-smoking sentiment, state-level tobacco expenditures, and include state and year fixed effects. \* $P < 0.05$ ; \*\* $P < 0.01$ ; \*\*\* $P < 0.001$ .

S3. Odds ratios for cessation associated with smoke-free workplace law coverage across categories of race/ethnicity, and race/ethnicity and gender.

|                                | Model 7               |                  |                     |                  |                     |                  | Model 8              |                  |                       |                  |                     |                  |
|--------------------------------|-----------------------|------------------|---------------------|------------------|---------------------|------------------|----------------------|------------------|-----------------------|------------------|---------------------|------------------|
|                                | Ages<br>25–39         | P <sub>int</sub> | Ages<br>40–54       | P <sub>int</sub> | Ages<br>55–65       | P <sub>int</sub> | Ages<br>25–39        | P <sub>int</sub> | Ages<br>40–54         | P <sub>int</sub> | Ages<br>55–65       | P <sub>int</sub> |
| Smoke-free workplace law       | 1.10<br>(0.89–1.37)   |                  | 1.27<br>(0.99–1.62) |                  | 0.98<br>(0.71–1.35) |                  | 1.09<br>(0.86–1.38)  |                  | 1.24<br>(0.95–1.63)   |                  | 0.98<br>(0.69–1.39) |                  |
| Male                           | 0.94<br>(0.86–1.02)   |                  | 0.99<br>(0.90–1.09) |                  | 0.95<br>(0.84–1.08) |                  | 0.97<br>(0.86–1.11)  |                  | 1.00<br>(0.87–1.15)   |                  | 1.00<br>(0.83–1.21) |                  |
| Race/ethnicity (NHW reference) |                       |                  |                     |                  |                     |                  |                      |                  |                       |                  |                     |                  |
| Non-Hispanic Black (NHB)       | 0.79<br>(0.61–1.01)   |                  | 0.81<br>(0.63–1.03) |                  | 0.89<br>(0.65–1.21) |                  | 0.97<br>(0.71–1.33)  |                  | 0.90<br>(0.66–1.24)   |                  | 0.92<br>(0.60–1.40) |                  |
| Hispanic                       | 1.34**<br>(1.09–1.65) |                  | 1.30<br>(0.99–1.71) |                  | 1.00<br>(0.63–1.58) |                  | 1.41*<br>(1.05–1.89) |                  | 1.67**<br>(1.16–2.42) |                  | 1.25<br>(0.64–2.43) |                  |
| Other Non-Hispanic (NH)        | 0.91<br>(0.70–1.20)   |                  | 0.76<br>(0.54–1.05) |                  | 0.84<br>(0.52–1.37) |                  | 1.11<br>(0.76–1.62)  |                  | 0.48*<br>(0.27–0.84)  |                  | 1.29<br>(0.66–2.55) |                  |
| Law×Race/ethnicity             |                       |                  |                     |                  |                     |                  |                      |                  |                       |                  |                     |                  |
| Law×NHB                        | 1.15<br>(0.75–1.76)   |                  | 1.07<br>(0.72–1.59) |                  | 1.02<br>(0.62–1.68) |                  | 1.03<br>(0.60–1.78)  |                  | 0.86<br>(0.50–1.49)   |                  | 1.17<br>(0.59–2.30) |                  |
| Law×Hispanic                   | 0.90<br>(0.64–1.26)   | 0.223            | 1.02<br>(0.68–1.52) | 0.989            | 0.72<br>(0.34–1.53) | 0.530            | 1.01<br>(0.63–1.63)  |                  | 0.86<br>(0.49–1.52)   |                  | 0.68<br>(0.23–2.05) |                  |
| Law×Other NH                   | 0.65<br>(0.42–1.02)   |                  | 0.98<br>(0.57–1.69) |                  | 1.54<br>(0.76–3.14) |                  | 0.51*<br>(0.26–0.98) |                  | 1.84<br>(0.77–4.42)   |                  | 1.02<br>(0.38–2.76) |                  |
| Law×Male                       |                       |                  |                     |                  |                     |                  | 1.03<br>(0.84–1.27)  |                  | 1.05<br>(0.83–1.32)   |                  | 1.00<br>(0.75–1.34) |                  |
| Race/ethnicity×Male            |                       |                  |                     |                  |                     |                  |                      |                  |                       |                  |                     |                  |
| NHB×Male                       |                       |                  |                     |                  |                     |                  | 0.65<br>(0.39–1.07)  |                  | 0.80<br>(0.50–1.28)   |                  | 0.93<br>(0.52–1.69) |                  |
| Hispanic×Male                  |                       |                  |                     |                  |                     |                  | 0.92<br>(0.62–1.36)  |                  | 0.66<br>(0.41–1.08)   |                  | 0.68<br>(0.29–1.62) |                  |
| Other NH×Male                  |                       |                  |                     |                  |                     |                  | 0.73<br>(0.43–1.22)  |                  | 1.92<br>(0.97–3.80)   |                  | 0.46<br>(0.18–1.22) |                  |
| Law×Race/ethnicity×Male        |                       |                  |                     |                  |                     |                  |                      |                  |                       |                  |                     |                  |
| Law×NHB×Male                   |                       |                  |                     |                  |                     |                  | 1.28<br>(0.55–2.97)  |                  | 1.50<br>(0.68–3.28)   |                  | 0.75<br>(0.28–2.04) |                  |
| Law×Hispanic×Male              |                       |                  |                     |                  |                     |                  | 0.83<br>(0.43–1.59)  | 0.680            | 1.29<br>(0.59–2.81)   | 0.202            | 1.07<br>(0.24–4.74) | 0.688            |
| Law×Other NH×Male              |                       |                  |                     |                  |                     |                  | 1.49<br>(0.62–3.57)  |                  | 0.38<br>(0.13–1.14)   |                  | 2.08<br>(0.53–8.23) |                  |

Models control for other smoke-free laws, education, family income, gender, age, state-level tobacco price, state-level anti-smoking sentiment, state-level tobacco expenditures, and include state and year fixed effects. \* $P < 0.05$ ; \*\* $P < 0.01$ ; \*\*\* $P < 0.001$ .

S4. Odds ratios for cessation associated with smoke-free workplace law coverage across levels of family income, and family income and gender.

|                                  | Model 9                |                  |                        |                  | Model 10             |                  |                        |                  |                       |                  |                     |                  |
|----------------------------------|------------------------|------------------|------------------------|------------------|----------------------|------------------|------------------------|------------------|-----------------------|------------------|---------------------|------------------|
|                                  | Ages<br>25–39          | P <sub>int</sub> | Ages<br>40–54          | P <sub>int</sub> | Ages<br>55–65        | P <sub>int</sub> | Ages<br>25–39          | P <sub>int</sub> | Ages<br>40–54         | P <sub>int</sub> | Ages<br>55–65       | P <sub>int</sub> |
| Smoke-free workplace law         | 1.30<br>(0.92–1.84)    |                  | 1.29<br>(0.91–1.84)    |                  | 1.08<br>(0.70–1.66)  |                  | 1.98**<br>(1.33–2.96)  |                  | 1.35<br>(0.88–2.07)   |                  | 1.19<br>(0.71–2.00) |                  |
| Male                             | 0.94<br>(0.86–1.02)    |                  | 0.99<br>(0.90–1.09)    |                  | 0.95<br>(0.84–1.08)  |                  | 1.45*<br>(1.04–2.03)   |                  | 1.01<br>(0.72–1.42)   |                  | 0.93<br>(0.62–1.40) |                  |
| Family income (<\$15K reference) |                        |                  |                        |                  |                      |                  |                        |                  |                       |                  |                     |                  |
| \$15K–\$29,999                   | 1.16<br>(0.91–1.46)    |                  | 0.97<br>(0.76–1.24)    |                  | 1.25<br>(0.95–1.66)  |                  | 1.37*<br>(1.01–1.85)   |                  | 1.14<br>(0.83–1.58)   |                  | 1.30<br>(0.88–1.91) |                  |
| \$30k–\$49,999                   | 1.45**<br>(1.17–1.79)  |                  | 1.10<br>(0.88–1.38)    |                  | 1.26<br>(0.95–1.67)  |                  | 1.94***<br>(1.47–2.57) |                  | 1.18<br>(0.87–1.59)   |                  | 1.37<br>(0.95–1.98) |                  |
| \$50k–\$74,999                   | 2.02***<br>(1.62–2.52) |                  | 1.45**<br>(1.15–1.82)  |                  | 1.28<br>(0.95–1.73)  |                  | 2.52***<br>(1.89–3.38) |                  | 1.42*<br>(1.05–1.93)  |                  | 1.12<br>(0.74–1.70) |                  |
| \$75K+                           | 1.96***<br>(1.57–2.46) |                  | 1.69***<br>(1.35–2.12) |                  | 1.45*<br>(1.07–1.96) |                  | 2.78***<br>(2.06–3.76) |                  | 1.63**<br>(1.21–2.20) |                  | 1.30<br>(0.84–1.99) |                  |
| Law×Family income                |                        |                  |                        |                  |                      |                  |                        |                  |                       |                  |                     |                  |
| Law×15K–\$29,999                 | 0.86<br>(0.59–1.26)    |                  | 1.09<br>(0.74–1.62)    |                  | 0.91<br>(0.59–1.41)  |                  | 0.55*<br>(0.34–0.88)   |                  | 0.88<br>(0.52–1.49)   |                  | 0.79<br>(0.43–1.43) |                  |
| Law×\$30K–\$49,999               | 0.88<br>(0.62–1.24)    | 0.264            | 1.01<br>(0.70–1.46)    | 0.898            | 0.83<br>(0.54–1.27)  | 0.758            | 0.48**<br>(0.31–0.74)  |                  | 0.97<br>(0.59–1.62)   |                  | 0.59<br>(0.33–1.06) |                  |
| Law×\$50K–\$74,999               | 0.71*<br>(0.50–1.01)   |                  | 0.91<br>(0.63–1.32)    |                  | 1.03<br>(0.66–1.60)  |                  | 0.46**<br>(0.30–0.73)  |                  | 0.86<br>(0.53–1.40)   |                  | 1.05<br>(0.57–1.93) |                  |
| Law×75K+                         | 0.75<br>(0.53–1.07)    |                  | 0.96<br>(0.68–1.36)    |                  | 0.81<br>(0.52–1.26)  |                  | 0.40***<br>(0.26–0.64) |                  | 0.89<br>(0.55–1.43)   |                  | 0.83<br>(0.44–1.59) |                  |
| Law×Male                         |                        |                  |                        |                  |                      |                  | 0.39**<br>(0.22–0.69)  |                  | 0.91<br>(0.52–1.59)   |                  | 0.81<br>(0.43–1.53) |                  |
| Family income×Male               |                        |                  |                        |                  |                      |                  |                        |                  |                       |                  |                     |                  |
| \$15K–\$29,999×Male              |                        |                  |                        |                  |                      |                  | 0.70<br>(0.45–1.09)    |                  | 0.72<br>(0.45–1.16)   |                  | 0.94<br>(0.53–1.64) |                  |
| \$30K–\$49,999×Male              |                        |                  |                        |                  |                      |                  | 0.56**<br>(0.37–0.84)  |                  | 0.88<br>(0.57–1.37)   |                  | 0.84<br>(0.49–1.44) |                  |
| \$50K–\$74,999×Male              |                        |                  |                        |                  |                      |                  | 0.64*<br>(0.43–0.96)   |                  | 1.03<br>(0.67–1.59)   |                  | 1.27<br>(0.70–2.29) |                  |
| \$75K×Male                       |                        |                  |                        |                  |                      |                  | 0.51**<br>(0.33–0.77)  |                  | 1.06<br>(0.70–1.62)   |                  | 1.21<br>(0.68–2.16) |                  |
| Law×Family income×Male           |                        |                  |                        |                  |                      |                  |                        |                  |                       |                  |                     |                  |
| Law×\$15K–\$29,999×Male          |                        |                  |                        |                  |                      |                  | 2.72**<br>(1.28–5.77)  |                  | 1.55<br>(0.71–3.40)   |                  | 1.35<br>(0.56–3.25) |                  |
| Law×\$30K–\$49,999×Male          |                        |                  |                        |                  |                      |                  | 3.59***<br>(1.77–7.25) | 0.004            | 1.09<br>(0.52–2.30)   | 0.846            | 1.95<br>(0.83–4.56) | 0.427            |
| Law×\$50K–\$74,999×Male          |                        |                  |                        |                  |                      |                  | 2.61**<br>(1.31–5.22)  |                  | 1.12<br>(0.55–2.31)   |                  | 1.00<br>(0.41–2.43) |                  |
| Law×\$75K×Male                   |                        |                  |                        |                  |                      |                  | 3.68***<br>(1.81–7.44) |                  | 1.18<br>(0.58–2.36)   |                  | 1.00<br>(0.41–2.42) |                  |

Models control for other smoke-free laws, education, race/ethnicity, gender, age, state-level tobacco price, state-level anti-smoking sentiment, state-level tobacco expenditures, with state and year fixed effects. \* $P < 0.05$ ; \*\* $P < 0.01$ ; \*\*\* $P < 0.001$ .

**S5. Gender-stratified odds ratios for cessation associated with smoke-free workplace law coverage across categories of family income, ages 25–39.**

|                                  | <b>Males</b>          | <b>p<sub>int</sub></b> | <b>Females</b>         | <b>p<sub>int</sub></b> |
|----------------------------------|-----------------------|------------------------|------------------------|------------------------|
| Smoke-free workplace law         | 0.74<br>(0.43–1.27)   |                        | 2.15**<br>(1.37–3.37)  |                        |
| Family income (<\$15K reference) |                       |                        |                        |                        |
| \$15K–\$29,999                   | 0.95<br>(0.68–1.33)   |                        | 1.41*<br>(1.04–1.91)   |                        |
| \$30k–\$49,999                   | 1.07<br>(0.79–1.46)   |                        | 2.00***<br>(1.51–2.66) |                        |
| \$50k–\$74,999                   | 1.58**<br>(1.17–2.15) |                        | 2.65***<br>(1.96–3.56) |                        |
| \$75K+                           | 1.39*<br>(1.01–1.91)  |                        | 2.91***<br>(2.14–3.97) |                        |
| Law×Family income                |                       |                        |                        |                        |
| Law×\$15K–\$29,999               | 1.49<br>(0.81–2.73)   |                        | 0.55*<br>(0.34–0.88)   |                        |
| Law×\$30K–\$49,999               | 1.70<br>(0.98–2.96)   | 0.234                  | 0.48**<br>(0.31–0.75)  | 0.002                  |
| Law×\$50K–\$74,999               | 1.20<br>(0.70–2.06)   |                        | 0.46***<br>(0.29–0.72) |                        |
| Law×\$75K                        | 1.47<br>(0.84–2.55)   |                        | 0.40***<br>(0.25–0.64) |                        |

Models control for other smoke-free laws, race/ethnicity, family income, gender, age, state-level tobacco price, state-level anti-smoking sentiment, state-level tobacco expenditures, with state and year fixed effects. \* $P < 0.05$ ; \*\* $P < 0.01$ ; \*\*\* $P < 0.001$ .

**S6. Odds ratios for cessation associated with smoke-free hospitality law coverage by gender.**

|                            | <b>Model 11</b>     |                     |                     |
|----------------------------|---------------------|---------------------|---------------------|
|                            | Ages                | Ages                | Ages                |
|                            | 25–39               | 40–54               | 55–65               |
| Smoke-free hospitality law | 1.08<br>(0.85–1.37) | 0.85<br>(0.64–1.13) | 1.32<br>(0.92–1.88) |
| Male                       | 0.94<br>(0.83–1.07) | 0.98<br>(0.86–1.13) | 1.00<br>(0.83–1.20) |
| Law×Male                   | 0.99<br>(0.83–1.19) | 1.01<br>(0.82–1.24) | 0.92<br>(0.71–1.20) |

Model controls for other smoke-free laws, education, race/ethnicity, family income, gender, age, state-level tobacco price, state-level anti-smoking sentiment, and state tobacco control expenditures, with state and year fixed effects. \* $P < 0.05$ ; \*\* $P < 0.01$ ; \*\*\* $P < 0.001$ .

S7. Odds ratios for cessation associated with smoke-free hospitality law coverage across levels of education, and education and gender.

|                                | Model 12               |                  |                        |                  |                     |                  | Model 13               |                  |                       |                  |                     |                  |
|--------------------------------|------------------------|------------------|------------------------|------------------|---------------------|------------------|------------------------|------------------|-----------------------|------------------|---------------------|------------------|
|                                | Ages<br>25–39          | P <sub>int</sub> | Ages<br>40–54          | P <sub>int</sub> | Ages<br>55–65       | P <sub>int</sub> | Ages<br>25–39          | P <sub>int</sub> | Ages<br>40–54         | P <sub>int</sub> | Ages<br>55–65       | P <sub>int</sub> |
| Smoke-free hospitality law     | 0.92<br>(0.70–1.21)    |                  | 0.80<br>(0.57–1.12)    |                  | 1.40<br>(0.91–2.16) |                  | 0.85<br>(0.62–1.18)    |                  | 1.00<br>(0.66–1.49)   |                  | 1.76<br>(0.99–3.13) |                  |
| Male                           | 0.94<br>(0.86–1.02)    |                  | 0.99<br>(0.90–1.09)    |                  | 0.95<br>(0.84–1.08) |                  | 0.87<br>(0.66–1.13)    |                  | 1.19<br>(0.86–1.65)   |                  | 1.38<br>(0.85–2.24) |                  |
| Education (College+ reference) |                        |                  |                        |                  |                     |                  |                        |                  |                       |                  |                     |                  |
| Less than high school (HS)     | 0.29***<br>(0.22–0.38) |                  | 0.51***<br>(0.39–0.68) |                  | 0.77<br>(0.55–1.08) |                  | 0.27***<br>(0.18–0.39) |                  | 0.68*<br>(0.46–0.98)  |                  | 0.93<br>(0.56–1.54) |                  |
| HS or equivalent               | 0.40***<br>(0.33–0.48) |                  | 0.64***<br>(0.53–0.79) |                  | 0.84<br>(0.63–1.12) |                  | 0.38***<br>(0.30–0.48) |                  | 0.70*<br>(0.53–0.93)  |                  | 1.07<br>(0.70–1.65) |                  |
| Some college                   | 0.62***<br>(0.53–0.74) |                  | 0.82<br>(0.67–1.01)    |                  | 0.95<br>(0.71–1.28) |                  | 0.59***<br>(0.47–0.73) |                  | 0.93<br>(0.70–1.23)   |                  | 1.21<br>(0.78–1.87) |                  |
| Law×Education                  |                        |                  |                        |                  |                     |                  |                        |                  |                       |                  |                     |                  |
| Law×Less than HS               | 1.44*<br>(1.00–2.09)   |                  | 1.12<br>(0.75–1.67)    |                  | 0.80<br>(0.49–1.31) |                  | 1.80*<br>(1.06–3.08)   |                  | 0.57<br>(0.32–1.01)   |                  | 0.81<br>(0.39–1.67) |                  |
| Law×HS or equiv.               | 1.26<br>(0.98–1.61)    | 0.161            | 1.13<br>(0.84–1.51)    | 0.782            | 0.91<br>(0.61–1.36) | 0.849            | 1.39<br>(0.97–1.97)    |                  | 0.93<br>(0.62–1.39)   |                  | 0.72<br>(0.41–1.29) |                  |
| Law×Some college               | 1.14<br>(0.90–1.44)    |                  | 1.01<br>(0.75–1.36)    |                  | 0.89<br>(0.60–1.32) |                  | 1.26<br>(0.91–1.75)    |                  | 0.80<br>(0.53–1.19)   |                  | 0.69<br>(0.38–1.24) |                  |
| Law×Male                       |                        |                  |                        |                  |                     |                  | 1.15<br>(0.80–1.65)    |                  | 0.67<br>(0.42–1.07)   |                  | 0.69<br>(0.36–1.32) |                  |
| Education×Male                 |                        |                  |                        |                  |                     |                  |                        |                  |                       |                  |                     |                  |
| Less than HS×Male              |                        |                  |                        |                  |                     |                  | 1.15<br>(0.69–1.93)    |                  | 0.61<br>(0.35–1.04)   |                  | 0.74<br>(0.38–1.43) |                  |
| HS or equivalen×Male           |                        |                  |                        |                  |                     |                  | 1.09<br>(0.77–1.52)    |                  | 0.86<br>(0.58–1.27)   |                  | 0.66<br>(0.37–1.18) |                  |
| Some college×Male              |                        |                  |                        |                  |                     |                  | 1.13<br>(0.81–1.57)    |                  | 0.80<br>(0.54–1.20)   |                  | 0.68<br>(0.38–1.22) |                  |
| Law×Education×Male             |                        |                  |                        |                  |                     |                  |                        |                  |                       |                  |                     |                  |
| Law×Less than HS×Male          |                        |                  |                        |                  |                     |                  | 0.68<br>(0.32–1.41)    |                  | 3.21**<br>(1.45–7.10) |                  | 0.95<br>(0.36–2.49) |                  |
| Law×HS or equiv×Male           |                        |                  |                        |                  |                     |                  | 0.84<br>(0.52–1.38)    | 0.727            | 1.44<br>(0.80–2.57)   | 0.039            | 1.46<br>(0.67–3.22) | 0.557            |
| Law×Some college×Male          |                        |                  |                        |                  |                     |                  | 0.82<br>(0.51–1.32)    |                  | 1.56<br>(0.87–2.81)   |                  | 1.51<br>(0.69–3.34) |                  |

Models control for other smoke-free laws, race/ethnicity, family income, gender, age, state-level tobacco price, state-level anti-smoking sentiment, state-level tobacco expenditures, and include state and year fixed effects

\* $P < 0.05$ ; \*\* $P < 0.01$ ; \*\*\* $P < 0.001$

S8. Odds ratios for cessation associated with smoke-free hospitality law coverage across categories of race/ethnicity, and race/ethnicity and gender.

|                                | Model 14            |                  |                       |                  |                      |                  | Model 15             |                  |                        |                  |                      |                  |
|--------------------------------|---------------------|------------------|-----------------------|------------------|----------------------|------------------|----------------------|------------------|------------------------|------------------|----------------------|------------------|
|                                | Ages<br>25–39       | P <sub>int</sub> | Ages<br>40–54         | P <sub>int</sub> | Ages<br>55–65        | P <sub>int</sub> | Ages<br>25–39        | P <sub>int</sub> | Ages<br>40–54          | P <sub>int</sub> | Ages<br>55–65        | P <sub>int</sub> |
| Smoke-free hospitality law     | 1.07<br>(0.85–1.35) |                  | 0.88<br>(0.67–1.14)   |                  | 1.27<br>(0.91–1.78)  |                  | 1.08<br>(0.84–1.39)  |                  | 0.90<br>(0.67–1.20)    |                  | 1.36<br>(0.94–1.96)  |                  |
| Male                           | 0.94<br>(0.86–1.02) |                  | 0.99<br>(0.90–1.09)   |                  | 0.95<br>(0.84–1.08)  |                  | 1.00<br>(0.87–1.14)  |                  | 1.04<br>(0.90–1.21)    |                  | 1.07<br>(0.88–1.31)  |                  |
| Race/ethnicity (NHW reference) |                     |                  |                       |                  |                      |                  |                      |                  |                        |                  |                      |                  |
| Non-Hispanic Black<br>(NHB)    | 0.84<br>(0.64–1.10) |                  | 0.77<br>(0.59–1.00)   |                  | 0.99<br>(0.72–1.36)  |                  | 1.03<br>(0.74–1.45)  |                  | 0.88<br>(0.62–1.25)    |                  | 1.12<br>(0.72–1.74)  |                  |
| Hispanic                       | 1.15<br>(0.88–1.50) |                  | 1.57**<br>(1.16–2.13) |                  | 1.04<br>(0.60–1.79)  |                  | 1.17<br>(0.80–1.71)  |                  | 2.22***<br>(1.50–3.29) |                  | 1.36<br>(0.63–2.92)  |                  |
| Other Non-Hispanic (NH)        | 0.95<br>(0.70–1.28) |                  | 0.84<br>(0.56–1.24)   |                  | 0.56*<br>(0.32–0.98) |                  | 1.20<br>(0.81–1.79)  |                  | 0.70<br>(0.36–1.35)    |                  | 0.97<br>(0.46–2.06)  |                  |
| Law×Race/ethnicity             |                     |                  |                       |                  |                      |                  |                      |                  |                        |                  |                      |                  |
| Law×NHB                        | 0.98<br>(0.65–1.48) |                  | 1.18<br>(0.79–1.75)   |                  | 0.82<br>(0.50–1.34)  |                  | 0.90<br>(0.53–1.52)  |                  | 0.95<br>(0.56–1.62)    |                  | 0.78<br>(0.39–1.55)  |                  |
| Law×Hispanic                   | 1.17<br>(0.84–1.62) | 0.234            | 0.76<br>(0.51–1.12)   | 0.377            | 0.75<br>(0.38–1.48)  | 0.054            | 1.30<br>(0.81–2.10)  |                  | 0.57*<br>(0.34–0.97)   |                  | 0.65<br>(0.25–1.69)  |                  |
| Law×Other NH                   | 0.69<br>(0.46–1.04) |                  | 0.83<br>(0.49–1.42)   |                  | 2.46*<br>(1.20–5/08) |                  | 0.54*<br>(0.29–0.99) |                  | 0.89<br>(0.37–2.15)    |                  | 1.57<br>(0.56–4.38)  |                  |
| Law×Male                       |                     |                  |                       |                  |                      |                  | 0.98<br>(0.80–1.20)  |                  | 0.96<br>(0.76–1.21)    |                  | 0.89<br>(0.67–1.18)  |                  |
| Race/ethnicity×Male            |                     |                  |                       |                  |                      |                  |                      |                  |                        |                  |                      |                  |
| NHB×Male                       |                     |                  |                       |                  |                      |                  | 0.65<br>(0.40–1.12)  |                  | 0.77<br>(0.46–1.30)    |                  | 0.79<br>(0.42–1.46)  |                  |
| Hispani×Male                   |                     |                  |                       |                  |                      |                  | 0.96<br>(0.59–1.59)  |                  | 0.55*<br>(0.31–0.97)   |                  | 0.61<br>(0.22–1.69)  |                  |
| Other NH×Male                  |                     |                  |                       |                  |                      |                  | 0.67<br>(0.38–1.19)  |                  | 1.32<br>(0.59–2.95)    |                  | 0.33*<br>(0.11–0.98) |                  |
| Law×Race/ethnicity×Male        |                     |                  |                       |                  |                      |                  |                      |                  |                        |                  |                      |                  |
| Law×NHB×Male                   |                     |                  |                       |                  |                      |                  | 1.25<br>(0.56–2.83)  |                  | 1.49<br>(0.68–3.27)    |                  | 1.08<br>(0.41–2.88)  |                  |
| Law×Hispanic×Male              |                     |                  |                       |                  |                      |                  | 0.84<br>(0.44–1.60)  | 0.643            | 1.62<br>(0.76–3.44)    | 0.477            | 1.31<br>(0.35–4.87)  | 0.611            |
| Law×Other NH×Male              |                     |                  |                       |                  |                      |                  | 1.53<br>(0.67–3.45)  |                  | 0.88<br>(0.30–2.64)    |                  | 2.57<br>(0.62–10.61) |                  |

Models control for other smoke-free laws, education, family income, gender, age, state-level tobacco price, state-level anti-smoking sentiment, state-level tobacco expenditures, and include state and year fixed effects. \* $P < 0.05$ ; \*\* $P < 0.01$ ; \*\*\* $P < 0.001$ .

S9. Odds ratios for cessation associated with smoke-free hospitality law coverage across categories of family income, and family income and gender.

|                                  | Model 16               |                  |                        |                  | Model 17              |                  |                        |                  |                       |                  |                      |                  |
|----------------------------------|------------------------|------------------|------------------------|------------------|-----------------------|------------------|------------------------|------------------|-----------------------|------------------|----------------------|------------------|
|                                  | Ages<br>25–39          | P <sub>int</sub> | Ages<br>40–54          | P <sub>int</sub> | Ages<br>55–65         | P <sub>int</sub> | Ages<br>25–39          | P <sub>int</sub> | Ages<br>40–54         | P <sub>int</sub> | Ages<br>55–65        | P <sub>int</sub> |
| Smoke-free hospitality law       | 1.34<br>(0.95–1.87)    |                  | 0.89<br>(0.63–1.26)    |                  | 1.51<br>(1.00–2.30)   |                  | 1.70*<br>(1.13–2.56)   |                  | 0.90<br>(0.59–1.36)   |                  | 1.76*<br>(1.05–2.95) |                  |
| Male                             | 0.94<br>(0.86–1.02)    |                  | 0.99<br>(0.90–1.09)    |                  | 0.95<br>(0.84–1.08)   |                  | 1.27<br>(0.87–1.84)    |                  | 0.98<br>(0.68–1.41)   |                  | 1.00<br>(0.64–1.55)  |                  |
| Family income (<\$15K reference) |                        |                  |                        |                  |                       |                  |                        |                  |                       |                  |                      |                  |
| \$15K–\$29,999                   | 1.16<br>(0.90–1.49)    |                  | 0.89<br>(0.68–1.17)    |                  | 1.39*<br>(1.02–1.88)  |                  | 1.22<br>(0.87–1.69)    |                  | 1.07<br>(0.76–1.51)   |                  | 1.58*<br>(1.04–2.38) |                  |
| \$30k–\$49,999                   | 1.57***<br>(1.25–1.98) |                  | 1.13<br>(0.89–1.44)    |                  | 1.33<br>(0.99–1.80)   |                  | 1.91***<br>(1.41–2.59) |                  | 1.23<br>(0.89–1.69)   |                  | 1.38<br>(0.92–2.07)  |                  |
| \$50k–\$74,999                   | 2.07***<br>(1.63–2.64) |                  | 1.51**<br>(1.18–1.92)  |                  | 1.29<br>(0.94–1.78)   |                  | 2.39***<br>(1.74–3.29) |                  | 1.38<br>(0.99–1.92)   |                  | 1.14<br>(0.72–1.80)  |                  |
| \$75K+                           | 2.05***<br>(1.60–2.63) |                  | 1.80***<br>(1.42–2.29) |                  | 1.56**<br>(1.12–2.16) |                  | 2.68***<br>(1.92–3.72) |                  | 1.62**<br>(1.17–2.23) |                  | 1.34<br>(0.84–2.14)  |                  |
| Law×Family income                |                        |                  |                        |                  |                       |                  |                        |                  |                       |                  |                      |                  |
| Law×15K–\$29,999                 | 0.90<br>(0.62–1.28)    |                  | 1.25<br>(0.86–1.84)    |                  | 0.76<br>(0.49–1.18)   |                  | 0.75<br>(0.47–1.21)    |                  | 1.02<br>(0.62–1.69)   |                  | 0.56<br>(0.31–1.01)  |                  |
| Law×\$30K–\$49,999               | 0.77<br>(0.56–1.07)    | 0.284            | 0.96<br>(0.67–1.37)    | 0.207            | 0.76<br>(0.50–1.16)   | 0.374            | 0.55**<br>(0.36–0.85)  |                  | 0.90<br>(0.56–1.46)   |                  | 0.63<br>(0.36–1.13)  |                  |
| Law×\$50K–\$74,999               | 0.73<br>(0.52–1.01)    |                  | 0.85<br>(0.60–1.21)    |                  | 1.01<br>(0.65–1.57)   |                  | 0.58*<br>(0.37–0.90)   |                  | 0.93<br>(0.58–1.50)   |                  | 1.00<br>(0.54–1.87)  |                  |
| Law×\$75K+                       | 0.74<br>(0.53–1.04)    |                  | 0.86<br>(0.62–1.20)    |                  | 0.74<br>(0.47–1.15)   |                  | 0.50**<br>(0.32–0.80)  |                  | 0.93<br>(0.59–1.45)   |                  | 0.80<br>(0.42–1.51)  |                  |
| Law×Male                         |                        |                  |                        |                  |                       |                  | 0.60<br>(0.35–1.03)    |                  | 0.99<br>(0.58–1.69)   |                  | 0.73<br>(0.39–1.38)  |                  |
| Family income×Male               |                        |                  |                        |                  |                       |                  |                        |                  |                       |                  |                      |                  |
| \$15K–\$29,999×Male              |                        |                  |                        |                  |                       |                  | 0.89<br>(0.55–1.44)    |                  | 0.69<br>(0.41–1.16)   |                  | 0.77<br>(0.42–1.41)  |                  |
| \$30K–\$49,999×Male              |                        |                  |                        |                  |                       |                  | 0.68<br>(0.43–1.05)    |                  | 0.85<br>(0.53–1.37)   |                  | 0.93<br>(0.52–1.66)  |                  |
| \$50K–\$74,999×Male              |                        |                  |                        |                  |                       |                  | 0.74<br>(0.47–1.16)    |                  | 1.17<br>(0.74–1.87)   |                  | 1.23<br>(0.65–2.34)  |                  |
| \$75K×Male                       |                        |                  |                        |                  |                       |                  | 0.59*<br>(0.37–0.94)   |                  | 1.21<br>(0.77–1.92)   |                  | 1.27<br>(0.67–2.40)  |                  |
| Law×Family income×Male           |                        |                  |                        |                  |                       |                  |                        |                  |                       |                  |                      |                  |
| Law×\$15K–\$29,999×Male          |                        |                  |                        |                  |                       |                  | 1.45<br>(0.71–2.96)    |                  | 1.53<br>(0.71–3.36)   |                  | 1.89<br>(0.80–4.49)  |                  |
| Law×\$30K–\$49,999×Male          |                        |                  |                        |                  |                       |                  | 1.99*<br>(1.04–3.82)   | 0.184            | 1.14<br>(0.56–2.32)   | 0.483            | 1.45<br>(0.65–3.33)  | 0.441            |
| Law×\$50K–\$74,999×Male          |                        |                  |                        |                  |                       |                  | 1.65<br>(0.86–3.18)    |                  | 0.85<br>(0.42–1.70)   |                  | 1.06<br>(0.44–2.57)  |                  |
| Law×\$75K×Male                   |                        |                  |                        |                  |                       |                  | 2.16*<br>(1.11–4.22)   |                  | 0.89<br>(0.45–1.73)   |                  | 0.93<br>(0.38–2.27)  |                  |

Models control for other smoke-free laws, education, race/ethnicity, gender, age, state-level tobacco price, state-level anti-smoking sentiment, state-level tobacco expenditures, with state and year fixed effects. \* $P < 0.05$ ; \*\* $P < 0.01$ ; \*\*\* $P < 0.001$ .

**S10.** Odds ratios for cessation associated with self-reported workplace smoke-free policy coverage by gender.

|                                              | <b>Model 18</b>     |                     |                     |
|----------------------------------------------|---------------------|---------------------|---------------------|
|                                              | Ages<br>25–39       | Ages<br>40–54       | Ages<br>55–65       |
| Smoke-free workplace policy<br>(self-report) | 1.04<br>(0.87–1.24) | 1.22<br>(0.97–1.55) | 0.79<br>(0.55–1.13) |
| Male                                         | 1.02<br>(0.83–1.26) | 0.93<br>(0.69–1.25) | 0.94<br>(0.60–1.48) |
| Policy×Male                                  | 1.01<br>(0.79–1.29) | 1.06<br>(0.75–1.48) | 1.07<br>(0.64–1.78) |

Model controls for smoke-free hospitality laws, education, race/ethnicity, family income, gender, age, state-level tobacco price, state-level anti-smoking sentiment, and state tobacco control expenditures, with state and year fixed effects. \* $P < 0.05$ ; \*\* $P < 0.01$ ; \*\*\* $P < 0.001$ .



**S11.** Odds ratios for cessation associated with self-reported workplace smoke-free policy coverage across levels of education, and education and gender.

|                                              | Model 19               |                  |                       |                  | Model 20            |                  |                       |                  |                      |                  |                      |                  |
|----------------------------------------------|------------------------|------------------|-----------------------|------------------|---------------------|------------------|-----------------------|------------------|----------------------|------------------|----------------------|------------------|
|                                              | Ages<br>25–39          | P <sub>int</sub> | Ages<br>40–54         | P <sub>int</sub> | Ages<br>55–65       | P <sub>int</sub> | Ages<br>25–39         | P <sub>int</sub> | Ages<br>40–54        | P <sub>int</sub> | Ages<br>55–65        | P <sub>int</sub> |
| Smoke-free workplace policy<br>(self-report) | 1.08<br>(0.85–1.36)    |                  | 1.05<br>(0.73–1.50)   |                  | 1.06<br>(0.59–1.92) |                  | 1.05<br>(0.74–1.47)   |                  | 1.19<br>(0.72–1.96)  |                  | 0.60<br>(0.25–1.42)  |                  |
| Male                                         | 1.05<br>(0.94–1.17)    |                  | 0.97<br>(0.84–1.12)   |                  | 0.97<br>(0.77–1.22) |                  | 0.98<br>(0.65–1.47)   |                  | 1.02<br>(0.54–1.92)  |                  | 0.45<br>(0.16–1.30)  |                  |
| Education (College+ reference)               |                        |                  |                       |                  |                     |                  |                       |                  |                      |                  |                      |                  |
| Less than high school (HS)                   | 0.45**<br>(0.28–0.70)  |                  | 0.38**<br>(0.20–0.73) |                  | 0.85<br>(0.37–1.93) |                  | 0.27**<br>(0.12–0.61) |                  | 0.33*<br>(0.13–0.85) |                  | 0.43<br>(0.11–1.64)  |                  |
| HS or equivalent                             | 0.53***<br>(0.40–0.70) |                  | 0.55**<br>(0.37–0.83) |                  | 0.91<br>(0.47–1.76) |                  | 0.49**<br>(0.32–0.74) |                  | 0.69<br>(0.40–1.21)  |                  | 0.66<br>(0.26–1.65)  |                  |
| Some college                                 | 0.68**<br>(0.52–0.90)  |                  | 0.65*<br>(0.43–0.98)  |                  | 1.05<br>(0.53–2.05) |                  | 0.69<br>(0.47–1.02)   |                  | 0.59<br>(0.33–1.07)  |                  | 0.59<br>(0.22–1.60)  |                  |
| Policy×Education                             |                        |                  |                       |                  |                     |                  |                       |                  |                      |                  |                      |                  |
| Policy×Less than HS                          | 0.85<br>(0.48–1.49)    |                  | 1.22<br>(0.58–2.60)   |                  | 1.01<br>(0.39–2.62) |                  | 1.17<br>(0.46–2.98)   |                  | 1.17<br>(0.40–3.45)  |                  | 2.47<br>(0.54–11.29) |                  |
| Policy×HS or equiv.                          | 0.88<br>(0.63–1.22)    | 0.861            | 1.13<br>(0.71–1.78)   | 0.722            | 0.68<br>(0.33–1.41) | 0.569            | 0.87<br>(0.54–1.40)   |                  | 0.73<br>(0.39–1.37)  |                  | 1.19<br>(0.42–3.31)  |                  |
| Policy×Some college                          | 0.93<br>(0.68–1.28)    |                  | 1.30<br>(0.82–2.06)   |                  | 0.66<br>(0.31–1.38) |                  | 0.94<br>(0.60–1.46)   |                  | 1.32<br>(0.69–2.51)  |                  | 1.45<br>(0.48–4.37)  |                  |
| Policy×Male                                  |                        |                  |                       |                  |                     |                  | 1.04<br>(0.65–1.66)   |                  | 0.77<br>(0.38–1.57)  |                  | 2.96<br>(0.92–9.54)  |                  |
| Education×Male                               |                        |                  |                       |                  |                     |                  |                       |                  |                      |                  |                      |                  |
| Less than HS×Male                            |                        |                  |                       |                  |                     |                  | 2.00<br>(0.75–5.29)   |                  | 1.30<br>(0.36–4.69)  |                  | 3.56<br>(0.67–18.75) |                  |
| HS or equivalent×Male                        |                        |                  |                       |                  |                     |                  | 1.12<br>(0.64–1.96)   |                  | 0.65<br>(0.29–1.46)  |                  | 1.82<br>(0.50–6.54)  |                  |
| Some college×Male                            |                        |                  |                       |                  |                     |                  | 0.96<br>(0.56–1.65)   |                  | 1.19<br>(0.53–2.68)  |                  | 2.90<br>(0.76–11.05) |                  |
| Policy×Education×Male                        |                        |                  |                       |                  |                     |                  |                       |                  |                      |                  |                      |                  |
| Policy×Less than HS×Male                     |                        |                  |                       |                  |                     |                  | 0.67<br>(0.20–2.19)   |                  | 1.15<br>(0.26–5.14)  |                  | 0.19<br>(0.03–1.41)  |                  |
| Policy×HS or equiv×Male                      |                        |                  |                       |                  |                     |                  | 1.03<br>(0.53–1.99)   | 0.913            | 2.44<br>(0.98–6.08)  | 0.114            | 0.34<br>(0.08–1.48)  | 0.224            |
| Policy×Some college×Male                     |                        |                  |                       |                  |                     |                  | 1.00<br>(0.53–1.86)   |                  | 0.98<br>(0.39–2.43)  |                  | 0.23<br>(0.05–1.03)  |                  |

Models control for smoke-free hospitality laws, race/ethnicity, family income, gender, age, state-level tobacco price, state-level anti-smoking sentiment, state-level tobacco expenditures, and include state and year fixed effects. \* $P < 0.05$ ; \*\* $P < 0.01$ ; \*\*\* $P < 0.001$ .

**S12.** Odds ratios for cessation associated with self-reported workplace smoke-free policy coverage across categories of race/ethnicity, and race/ethnicity and gender.

|                                           | Model 21              |                  |                      |                  |                     |                  | Model 22            |                  |                     |                  |                       |                  |
|-------------------------------------------|-----------------------|------------------|----------------------|------------------|---------------------|------------------|---------------------|------------------|---------------------|------------------|-----------------------|------------------|
|                                           | Ages<br>25-39         | P <sub>int</sub> | Ages<br>40-54        | P <sub>int</sub> | Ages<br>55-65       | P <sub>int</sub> | Ages<br>25-39       | P <sub>int</sub> | Ages<br>40-54       | P <sub>int</sub> | Ages<br>55-65         | P <sub>int</sub> |
| Smoke-free workplace policy (self-report) | 0.99<br>(0.86-1.14)   |                  | 1.24*<br>(1.03-1.51) |                  | 0.76<br>(0.58-1.01) |                  | 1.00<br>(0.82-1.21) |                  | 1.19<br>(0.93-1.54) |                  | 0.80<br>(0.53-1.19)   |                  |
| Male                                      | 1.04<br>(0.93-1.17)   |                  | 0.98<br>(0.84-1.12)  |                  | 0.97<br>(0.77-1.22) |                  | 1.09<br>(0.86-1.37) |                  | 0.97<br>(0.69-1.35) |                  | 1.12<br>(0.69-1.83)   |                  |
| Race/ethnicity (NHW reference)            |                       |                  |                      |                  |                     |                  |                     |                  |                     |                  |                       |                  |
| Non-Hispanic Black (NHB)                  | 0.70<br>(0.41-1.17)   |                  | 0.98<br>(0.55-1.75)  |                  | 0.66<br>(0.28-1.53) |                  | 0.86<br>(0.43-1.73) |                  | 1.28<br>(0.60-2.72) |                  | 0.99<br>(0.36-2.78)   |                  |
| Hispanic                                  | 1.47*<br>(1.05-2.06)  |                  | 1.58<br>(0.91-2.64)  |                  | 0.49<br>(0.17-1.42) |                  | 1.38<br>(0.81-2.37) |                  | 1.34<br>(0.58-3.08) |                  | 0.51<br>(0.06-4.10)   |                  |
| Other Non-Hispanic (NH)                   | 0.50**<br>(0.30-0.83) |                  | 0.62<br>(0.27-1.44)  |                  | 0.92<br>(0.30-2.80) |                  | 0.78<br>(0.40-1.51) |                  | 0.61<br>(0.19-1.99) |                  | 2.59<br>(0.71-9.51)   |                  |
| Policy×Race/ethnicity                     |                       |                  |                      |                  |                     |                  |                     |                  |                     |                  |                       |                  |
| Policy×NHB                                | 1.33<br>(0.73-2.39)   |                  | 1.02<br>(0.54-1.93)  |                  | 1.51<br>(0.58-3.94) |                  | 1.24<br>(0.56-2.73) |                  | 0.81<br>(0.35-1.88) |                  | 1.22<br>(0.38-3.90)   |                  |
| Policy×Hispanic                           | 0.78<br>(0.51-1.18)   | 0.155            | 0.82<br>(0.45-1.51)  | 0.934            | 1.90<br>(0.55-6.57) | 0.578            | 0.85<br>(0.45-1.60) |                  | 1.24<br>(0.50-3.12) |                  | 1.56<br>(0.15-16.23)  |                  |
| Policy×Other NH                           | 1.60<br>(0.91-2.82)   |                  | 0.93<br>(0.36-2.38)  |                  | 0.70<br>(0.17-2.92) |                  | 1.03<br>(0.46-2.30) |                  | 1.28<br>(0.34-4.85) |                  | 0.34<br>(0.06-2.13)   |                  |
| Policy×Male                               |                       |                  |                      |                  |                     |                  | 0.99<br>(0.75-1.30) |                  | 1.10<br>(0.75-1.60) |                  | 0.93<br>(0.53-1.63)   |                  |
| Race/ethnicity×Male                       |                       |                  |                      |                  |                     |                  |                     |                  |                     |                  |                       |                  |
| NHB×Male                                  |                       |                  |                      |                  |                     |                  | 0.69<br>(0.25-1.90) |                  | 0.57<br>(0.18-1.80) |                  | 0.34<br>(0.06-1.92)   |                  |
| Hispanic×Male                             |                       |                  |                      |                  |                     |                  | 1.09<br>(0.55-2.16) |                  | 1.24<br>(0.43-3.56) |                  | 0.91<br>(0.08-10.18)  |                  |
| Other NH×Male                             |                       |                  |                      |                  |                     |                  | 0.45<br>(0.17-1.22) |                  | 1.03<br>(0.21-5.07) |                  | 0.08*<br>(0.01-0.86)  |                  |
| Policy×Race/ethnicity×Male                |                       |                  |                      |                  |                     |                  |                     |                  |                     |                  |                       |                  |
| Policy×NHB×Male                           |                       |                  |                      |                  |                     |                  | 1.09<br>(0.34-3.49) |                  | 1.60<br>(0.44-5.82) |                  | 1.72<br>(0.23-13.01)  |                  |
| Policy×Hispanic×Male                      |                       |                  |                      |                  |                     |                  | 0.88<br>(0.38-2.04) | 0.581            | 0.45<br>(0.13-1.55) | 0.456            | 1.40<br>(0.09-22.30)  | 0.601            |
| Policy×Other NH×Male                      |                       |                  |                      |                  |                     |                  | 2.20<br>(0.69-6.95) |                  | 0.58<br>(0.09-3.62) |                  | 7.01<br>(0.35-140.55) |                  |

Models control for smoke-free hospitality laws, education, family income, gender, age, state-level tobacco price, state-level anti-smoking sentiment, state-level tobacco expenditures, and include state and year fixed effects. \* $P < 0.05$ ; \*\* $P < 0.01$ ; \*\*\* $P < 0.001$ .

**S13.** Odds ratios for cessation associated with self-reported workplace smoke-free policy coverage across categories of family income, and family income and gender.

|                                              | Model 23              |                  |                      |                  |                     |                  | Model 24              |                  |                     |                  |                      |                  |
|----------------------------------------------|-----------------------|------------------|----------------------|------------------|---------------------|------------------|-----------------------|------------------|---------------------|------------------|----------------------|------------------|
|                                              | Ages<br>25–39         | P <sub>int</sub> | Ages<br>40–54        | P <sub>int</sub> | Ages<br>55–65       | P <sub>int</sub> | Ages<br>25–39         | P <sub>int</sub> | Ages<br>40–54       | P <sub>int</sub> | Ages<br>55–65        | P <sub>int</sub> |
| Smoke-free workplace policy<br>(self-report) | 1.10<br>(0.68–1.78)   |                  | 1.86<br>(0.95–3.63)  |                  | 1.31<br>(0.49–3.51) |                  | 1.16<br>(0.59–2.27)   |                  | 1.54<br>(0.71–3.34) |                  | 2.08<br>(0.47–9.13)  |                  |
| Male                                         | 1.05<br>(0.93–1.17)   |                  | 0.97<br>(0.84–1.12)  |                  | 0.97<br>(0.77–1.22) |                  | 1.35<br>(0.61–3.00)   |                  | 0.68<br>(0.19–2.48) |                  | 2.01<br>(0.34–11.82) |                  |
| Family income (<\$15K reference)             |                       |                  |                      |                  |                     |                  |                       |                  |                     |                  |                      |                  |
| \$15K–\$29,999                               | 1.28<br>(0.80–2.06)   |                  | 1.31<br>(0.64–2.66)  |                  | 1.20<br>(0.43–3.35) |                  | 1.34<br>(0.68–2.65)   |                  | 1.35<br>(0.59–3.09) |                  | 1.99<br>(0.44–8.99)  |                  |
| \$30k–\$49,999                               | 1.72*<br>(1.10–2.69)  |                  | 1.65<br>(0.86–3.19)  |                  | 1.45<br>(0.55–3.83) |                  | 1.92*<br>(1.01–3.68)  |                  | 1.33<br>(0.60–2.95) |                  | 2.95<br>(0.68–12858) |                  |
| \$50k–\$74,999                               | 1.89**<br>(1.20–2.99) |                  | 2.07*<br>(1.08–3.98) |                  | 1.51<br>(0.57–4.03) |                  | 2.26*<br>(1.19–4.29)  |                  | 1.91<br>(0.87–4.20) |                  | 1.22<br>(0.24–6.27)  |                  |
| \$75K+                                       | 2.10**<br>(1.31–3.37) |                  | 2.09*<br>(1.09–4.01) |                  | 1.22<br>(0.44–3.36) |                  | 2.62**<br>(1.34–5.11) |                  | 1.73<br>(0.79–3.86) |                  | 1.88<br>(0.37–9.43)  |                  |
| Policy×Family income                         |                       |                  |                      |                  |                     |                  |                       |                  |                     |                  |                      |                  |
| Policy×15K–\$29,999                          | 0.96<br>(0.54–1.70)   |                  | 0.63<br>(0.28–1.45)  |                  | 0.70<br>(0.22–2.26) |                  | 0.92<br>(0.41–2.04)   |                  | 0.68<br>(0.26–1.80) |                  | 0.36<br>(0.07–1.90)  |                  |
| Policy×\$30K–\$49,999                        | 0.79<br>(0.46–1.35)   | 0.888            | 0.59<br>(0.27–1.25)  | 0.278            | 0.41<br>(0.13–1.25) | 0.553            | 0.79<br>(0.37–1.68)   |                  | 0.82<br>(0.32–2.09) |                  | 0.19*<br>(0.04–0.97) |                  |
| Policy×\$50K–\$74,999                        | 1.02<br>(0.60–1.75)   |                  | 0.58<br>(0.27–1.22)  |                  | 0.60<br>(0.20–1.83) |                  | 0.90<br>(0.43–1.91)   |                  | 0.63<br>(0.26–1.56) |                  | 0.67<br>(0.12–3.91)  |                  |
| Policy×\$75K+                                | 0.87<br>(0.51–1.51)   |                  | 0.71<br>(0.34–1.49)  |                  | 0.73<br>(0.24–2.26) |                  | 0.78<br>(0.36–1.69)   |                  | 0.88<br>(0.36–2.19) |                  | 0.42<br>(0.07–2.33)  |                  |
| Policy×Male                                  |                       |                  |                      |                  |                     |                  | 0.91<br>(0.35–2.41)   |                  | 1.67<br>(0.38–7.25) |                  | 0.37<br>(0.05–2.93)  |                  |
| Family income×Male                           |                       |                  |                      |                  |                     |                  |                       |                  |                     |                  |                      |                  |
| \$15K–\$29,999×Male                          |                       |                  |                      |                  |                     |                  | 0.89<br>(0.35–2.30)   |                  | 0.98<br>(0.21–4.58) |                  | 0.36<br>(0.04–2.91)  |                  |
| \$30K–\$49,999×Male                          |                       |                  |                      |                  |                     |                  | 0.79<br>(0.32–1.93)   |                  | 1.67<br>(0.39–7.10) |                  | 0.21<br>(0.03–1.55)  |                  |
| \$50K–\$74,999×Male                          |                       |                  |                      |                  |                     |                  | 0.71<br>(0.29–1.74)   |                  | 1.30<br>(0.32–5.30) |                  | 1.18<br>(0.15–9.17)  |                  |
| \$75K×Male                                   |                       |                  |                      |                  |                     |                  | 0.67<br>(0.27–1.67)   |                  | 1.54<br>(0.38–6.33) |                  | 0.44<br>(0.06–3.38)  |                  |
| Policy*Family income×Male                    |                       |                  |                      |                  |                     |                  |                       |                  |                     |                  |                      |                  |
| Policy×\$15K–\$29,999×Male                   |                       |                  |                      |                  |                     |                  | 1.10<br>(0.34–3.51)   |                  | 0.76<br>(0.13–4.52) |                  | 4.35<br>(0.37–51.73) |                  |
| Policy×\$30K–\$49,999×Male                   |                       |                  |                      |                  |                     |                  | 0.98<br>(0.33–2.88)   | 0.964            | 0.45<br>(0.08–2.35) | 0.810            | 5.38<br>(0.52–55.87) | 0.279            |
| Policy×\$50K–\$74,999×Male                   |                       |                  |                      |                  |                     |                  | 1.25<br>(0.42–3.69)   |                  | 0.72<br>(0.15–3.59) |                  | 1.15<br>(0.11–12.52) |                  |
| Policy×\$75K×Male                            |                       |                  |                      |                  |                     |                  | 1.19<br>(0.39–3.58)   |                  | 0.58<br>(0.12–2.87) |                  | 3.24<br>(0.31–34.04) |                  |

Models control for smoke-free hospitality laws, education, race/ethnicity, gender, age, state-level tobacco price, state-level anti-smoking sentiment, state-level tobacco expenditures, with state and year fixed effects. \* $P < 0.05$ ; \*\* $P < 0.01$ ; \*\*\* $P < 0.001$ .
